# Supplementary material for: Cost-effectiveness of a physical activity and behaviour maintenance programme on functional mobility decline in older adults: an economic evaluation of the REACT (Retirement in Action) trial
Source: PubMed Central journal article supplement (PMC8967720; doi:10.1016/s2468-2667(22)00030-5), 2022-03-21
Supplement: mmc1.pdf [file mmc1.pdf]

# THE LANCET

## Public Health

### **Supplementary appendix 1**

This appendix formed part of the original submission and has been peer reviewed. We post it as supplied by the authors.

Supplement to: Snowsill TM, Stathi A, Green C, et al. Cost-effectiveness of a physical activity and behaviour maintenance programme on functional mobility decline in older adults: an economic evaluation of the REACT (Retirement in Action) trial. *Lancet Public Health* 2022; published online March 21. [https://doi.org/10.1016/S2468-2667\(22\)00030-5](https://doi.org/10.1016/S2468-2667(22)00030-5).

## APPENDIX

| Item                                                                         | Unit cost                  | Source                                                                                                                                                                                  |
|------------------------------------------------------------------------------|----------------------------|-----------------------------------------------------------------------------------------------------------------------------------------------------------------------------------------|
| <b>Primary and/or community-based services (per contact or consultation)</b> |                            |                                                                                                                                                                                         |
| GP at surgery/health centre                                                  | 39.19                      | PSSRU 2019 <sup>1</sup> (General practitioner cost per surgery consultation lasting 9-22 minutes, including direct care staff costs, including training)                                |
| GP via telephone                                                             | 15.52                      | PSSRU 2019 <sup>1</sup>                                                                                                                                                                 |
| GP home visit                                                                | 78.92                      | PSSRU 2014 <sup>3</sup> and PSSRU 2019 <sup>1</sup> (£156 per hour of GMS activity, 11.4 minutes visit, 1:0.61 direct-to-indirect time ratio (7.0 minutes indirect), 12 minutes travel) |
| Practice nurse at surgery/health centre                                      | 12.43                      | PSSRU 2014 <sup>3</sup> and PSSRU 2019 <sup>1</sup> (£37 per hour, 15.5 minutes per contact, 1:0.30 direct-to-indirect time ratio)                                                      |
| Practice nurse via telephone                                                 | 7.80                       | PSSRU 2019 <sup>1</sup>                                                                                                                                                                 |
| Practice nurse at home                                                       | 39.68                      | National Cost Collection 2018/19 <sup>2</sup> (N02AF – District Nurse, Face to face)                                                                                                    |
| Physiotherapist                                                              | 62.90                      | National Cost Collection 2018/19 <sup>2</sup> (A08A1 – Physiotherapist, Adult, One to one)                                                                                              |
| Occupational therapist                                                       | 83.17                      | National Cost Collection 2018/19 <sup>2</sup> (A06A1 – Occupational Therapist, Adult, One to one)                                                                                       |
| Nutritionist                                                                 | 89.90                      | National Cost Collection 2018/19 <sup>2</sup> (A03 – Dietician)                                                                                                                         |
| Chiropodist                                                                  | 42.51                      | National Cost Collection 2018/19 <sup>2</sup> (A09A – Podiatrist, Tier 1, General Podiatry)                                                                                             |
| Counsellor                                                                   | 45.00                      | PSSRU 2019 <sup>1</sup> (Agenda for Change band 6 for 1 hour)                                                                                                                           |
| Walk-in-Centre                                                               | 21.00                      | PSSRU 2019 <sup>1</sup> (Assume 15 minutes of Band 6 nurse time)                                                                                                                        |
| <b>Overnight hospital stays (per attendance)</b>                             |                            |                                                                                                                                                                                         |
| General medical ward or long-stay ward                                       | 385.16 plus 503.96 per day | NHS Reference Costs 2017/18 <sup>4</sup> inflated to 2018/19 prices <sup>1</sup>                                                                                                        |
| Intensive care unit                                                          | 3,532.09                   | National Cost Collection 2018/19 <sup>2</sup>                                                                                                                                           |
| <i>Other hospital usage</i>                                                  |                            |                                                                                                                                                                                         |
| Outpatient appointment                                                       | 126.85                     | National Cost Collection 2018/19 <sup>2</sup> (Weighted average of all Consultant-Led and Non-Consultant-Led Outpatient attendances)                                                    |
| Day case treatment                                                           | 751.90                     | National Cost Collection 2018/19 <sup>2</sup> (Weighted average of all Day Case episodes)                                                                                               |
| A&E attendance                                                               | 166.05                     | National Cost Collection 2018/19 <sup>2</sup> (Weighted average of all Accident & Emergency episodes)                                                                                   |
| <b>Social care services <sup>a</sup></b>                                     |                            |                                                                                                                                                                                         |
| Day care centre (per day)                                                    | 40.20                      | PSSRU 2019 <sup>1</sup>                                                                                                                                                                 |
| Convalescent or nursing home                                                 | 79.73                      | PSSRU 2019 <sup>1</sup>                                                                                                                                                                 |
| Paid care at home (per hour)                                                 | 18.95                      | PSSRU 2019 <sup>1</sup>                                                                                                                                                                 |

### Supplementary table 1: Unit costs of NHS and PSS resources

Note: <sup>a</sup> It is estimated that 33% of long-term care spending comes from voluntary and out-of-pocket expenditure,<sup>5</sup> and this is excluded from the unit costs in the NHS and PSS perspective

1. Curtis L, Burns A. *Unit Costs of Health and Social Care 2019*. Canterbury: Personal Social Services Research Unit, University of Kent; 2018. <http://dx.doi.org/10.22024/UniKent/01.02.79286>
2. NHS Improvement. *National Cost Collection for the NHS*. 2020. URL: <https://improvement.nhs.uk/resources/national-cost-collection/> (Accessed February 20, 2020).
3. Curtis L. *Unit Costs of Health and Social Care 2014*. Canterbury: Personal Social Services Research Unit, University of Kent; 2014.
4. NHS Improvement. *Reference costs*. 2018. URL: <https://improvement.nhs.uk/resources/reference-costs/>
5. Incisive Health. *An international comparison of long-term care funding and outcomes: Insights for the social care green paper*. 2018. URL: [https://www.incisivehealth.com/wp-content/uploads/2018/08/international\\_comparison\\_of\\_social\\_care\\_funding\\_and\\_outcomes.pdf](https://www.incisivehealth.com/wp-content/uploads/2018/08/international_comparison_of_social_care_funding_and_outcomes.pdf) (Accessed 8 June, 2020).

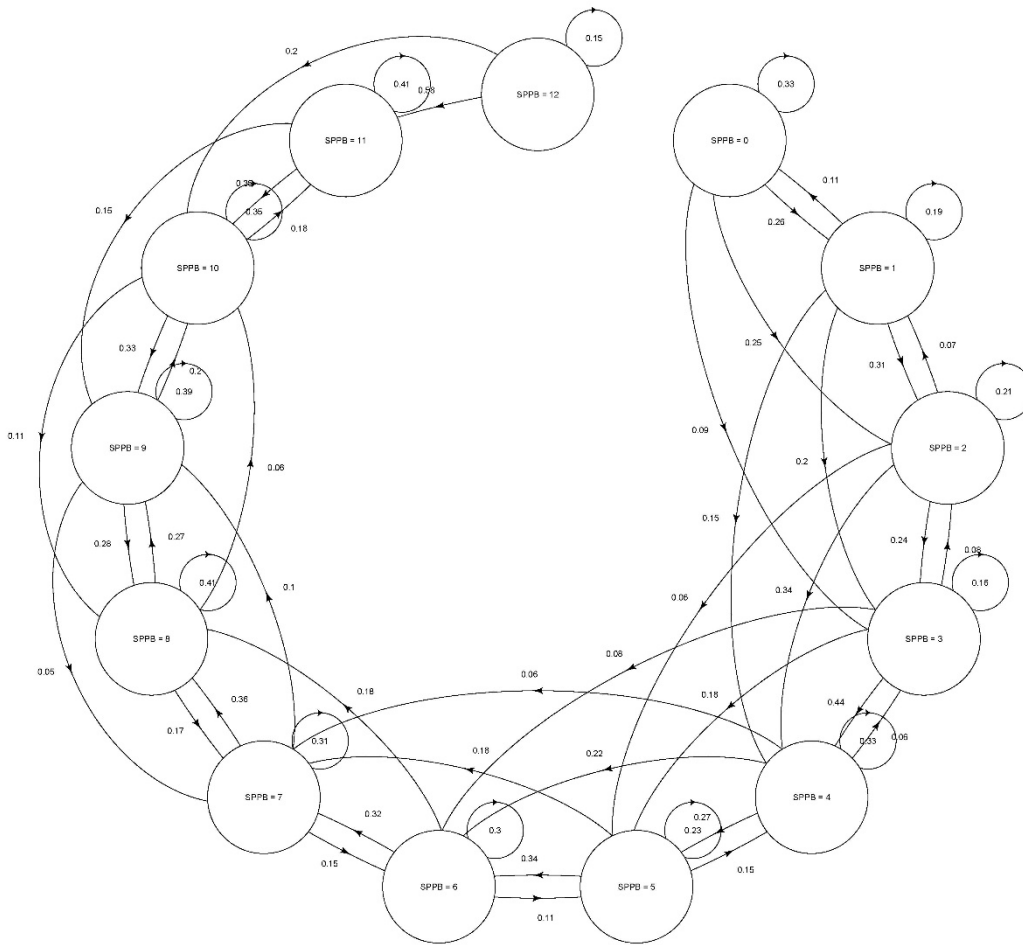

**Supplementary figure 1: Diagram of the Markov model for estimating long-term costs and outcomes**

*Notes: For clarity, the Dead state is omitted and only transition probabilities  $\geq 0.05$  are shown. Transition probabilities have been calculated for the third cycle (between 24 and 36 months post-randomisation) for a 75-year-old woman.)*

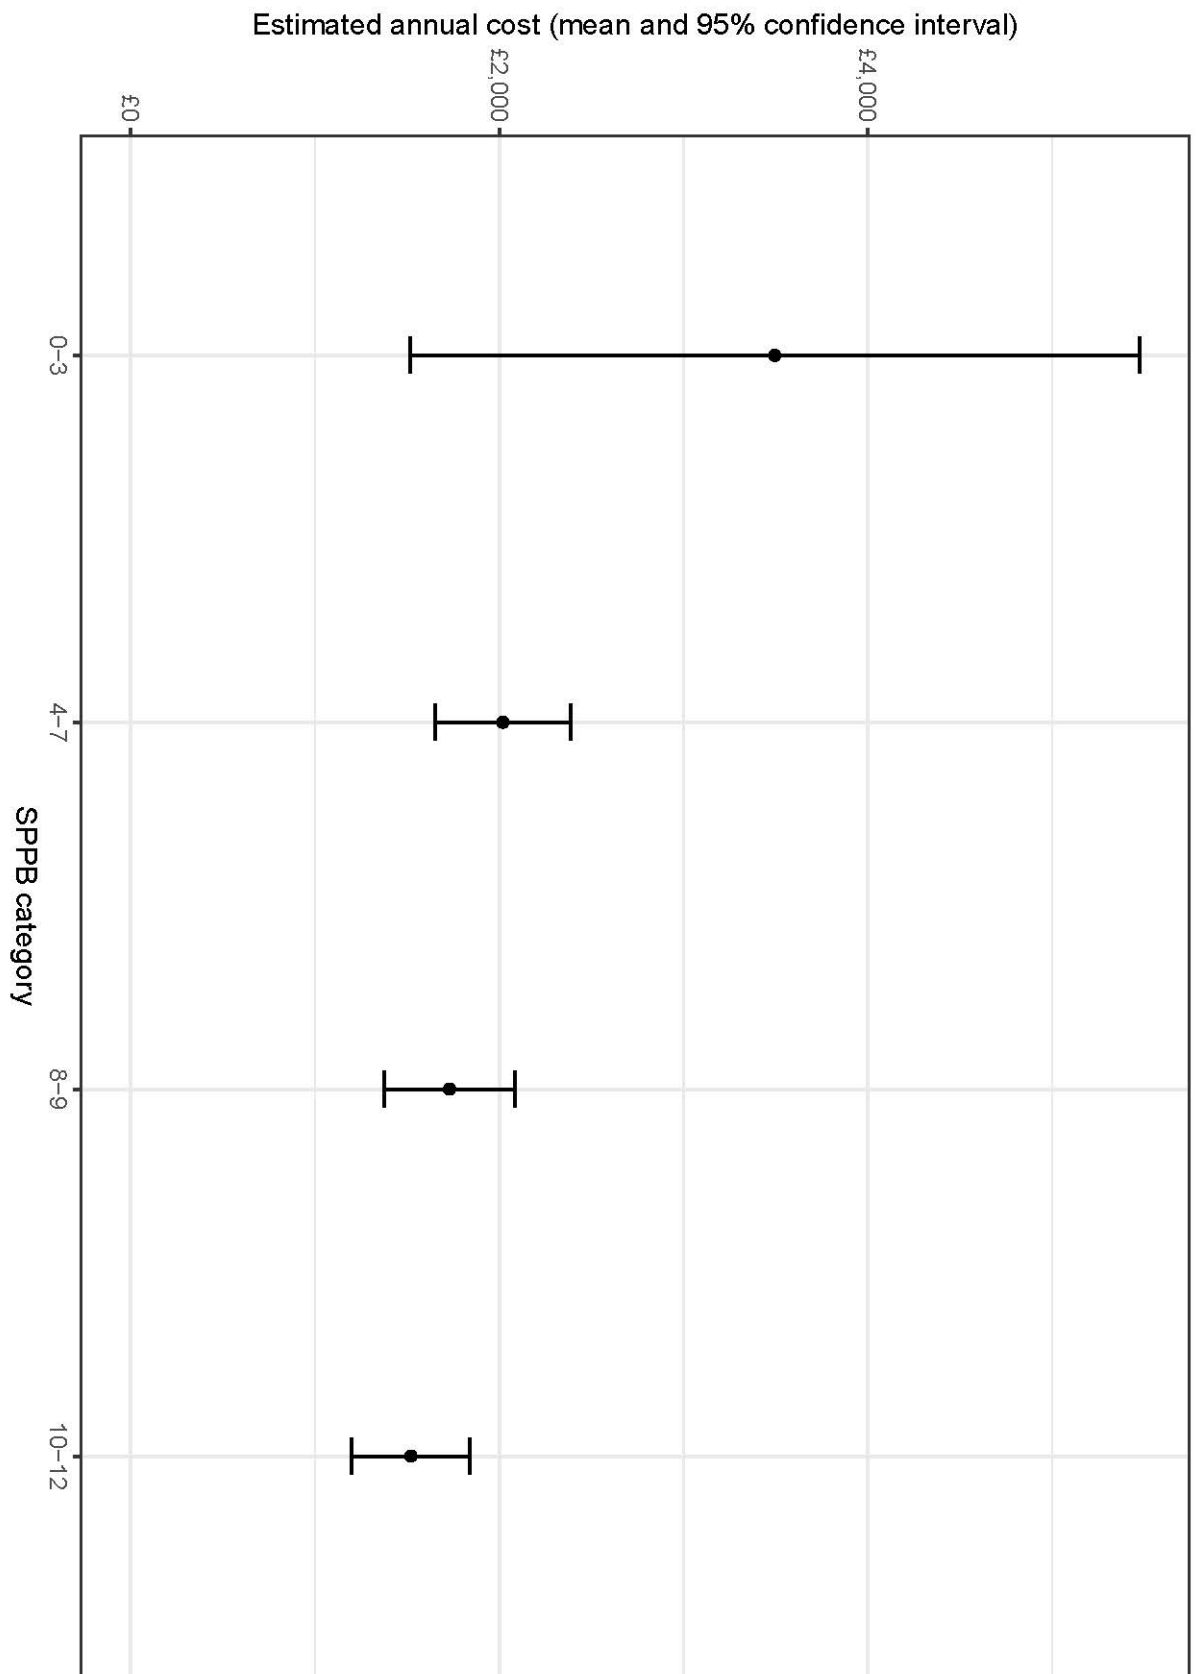

Supplementary figure 2: Cost by SPPB range

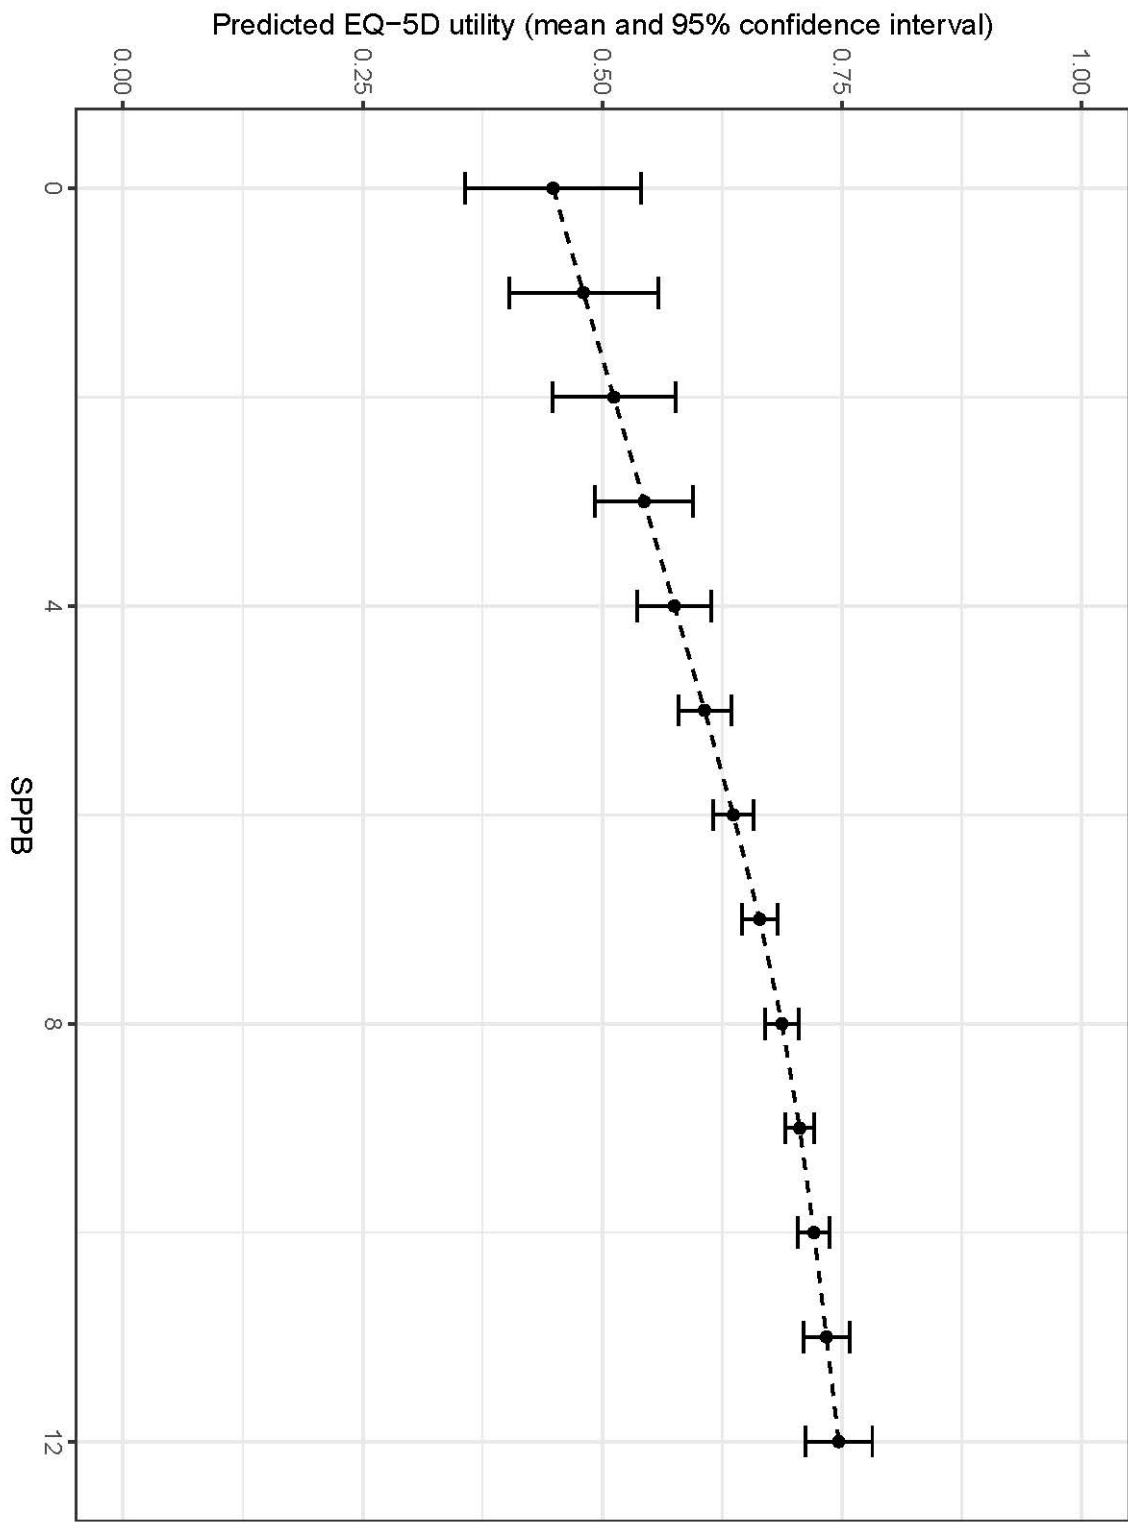

**Supplementary figure 3: Predicted EQ-5D utility according to SPPB.** Note: A restricted cubic regression spline with knots at SPPB = 4, SPPB = 8 and SPPB = 11 was used. Further details are given in Supplementary File 1.

| HRQoL                             | REACT        |              |              |              | Control      |              |              |              |
|-----------------------------------|--------------|--------------|--------------|--------------|--------------|--------------|--------------|--------------|
|                                   | Baseline     | 6 months     | 12 months    | 24 months    | Baseline     | 6 months     | 12 months    | 24 months    |
| <i>EQ-5D-5L dimensions, n (%)</i> |              |              |              |              |              |              |              |              |
| Mobility                          | 400          | 346          | 339          | 330          | 358          | 299          | 294          | 303          |
| 1                                 | 91<br>(23%)  | 122<br>(35%) | 108<br>(32%) | 102<br>(31%) | 78<br>(22%)  | 70<br>(23%)  | 71<br>(24%)  | 66<br>(22%)  |
| 2                                 | 154<br>(38%) | 104<br>(30%) | 109<br>(32%) | 89<br>(27%)  | 120<br>(34%) | 98<br>(33%)  | 98<br>(33%)  | 90<br>(30%)  |
| 3                                 | 124<br>(31%) | 95<br>(17%)  | 95<br>(28%)  | 103<br>(31%) | 135<br>(38%) | 100<br>(33%) | 100<br>(34%) | 109<br>(36%) |
| 4                                 | 30<br>(8%)   | 25<br>(7%)   | 27<br>(8%)   | 33<br>(10%)  | 24<br>(7%)   | 30<br>(10%)  | 23<br>(8%)   | 35<br>(12%)  |
| 5                                 | 1<br>(0%)    | 0<br>(0%)    | 0<br>(0%)    | 3<br>(1%)    | 1<br>(0%)    | 1<br>(0%)    | 2<br>(1%)    | 3<br>(1%)    |
| Self-care                         | 400          | 346          | 338          | 330          | 359          | 299          | 294          | 303          |
| 1                                 | 321<br>(80%) | 287<br>(83%) | 273<br>(81%) | 254<br>(77%) | 278<br>(77%) | 227<br>(76%) | 235<br>(80%) | 237<br>(78%) |
| 2                                 | 53<br>(13%)  | 43<br>(12%)  | 53<br>(16%)  | 59<br>(18%)  | 58<br>(16%)  | 57<br>(19%)  | 44<br>(15%)  | 46<br>(15%)  |
| 3                                 | 24<br>(6%)   | 15<br>(4%)   | 11<br>(3%)   | 14<br>(4%)   | 20<br>(6%)   | 13<br>(4%)   | 15<br>(5%)   | 15<br>(5%)   |
| 4                                 | 1<br>(0%)    | 1<br>(0%)    | 1<br>(0%)    | 1<br>(0%)    | 3<br>(1%)    | 2<br>(1%)    | 0<br>(0%)    | 2<br>(1%)    |
| 5                                 | 1<br>(0%)    | 0<br>(0%)    | 0<br>(0%)    | 2<br>(1%)    | 0<br>(0%)    | 0<br>(0%)    | 0<br>(0%)    | 3<br>(1%)    |
| Usual activities                  | 399          | 346          | 339          | 330          | 356          | 299          | 294          | 303          |
| 1                                 | 148<br>(37%) | 171<br>(49%) | 150<br>(44%) | 134<br>(41%) | 146<br>(41%) | 114<br>(38%) | 118<br>(40%) | 113<br>(37%) |
| 2                                 | 153<br>(38%) | 105<br>(30%) | 119<br>(34%) | 112<br>(34%) | 127<br>(36%) | 115<br>(38%) | 96<br>(33%)  | 114<br>(38%) |
| 3                                 | 77<br>(19%)  | 61<br>(18%)  | 120<br>(19%) | 64<br>(19%)  | 69<br>(19%)  | 57<br>(19%)  | 64<br>(22%)  | 59<br>(19%)  |
| 4                                 | 16<br>(4%)   | 8<br>(2%)    | 11<br>(3%)   | 14<br>(4%)   | 12<br>(3%)   | 10<br>(3%)   | 12<br>(4%)   | 8<br>(3%)    |
| 5                                 | 5<br>(1%)    | 1<br>(0%)    | 3<br>(1%)    | 6<br>(2%)    | 2<br>(1%)    | 3<br>(1%)    | 4<br>(1%)    | 9<br>(3%)    |
| Pain / discomfort                 | 400          | 346          | 339          | 330          | 358          | 300          | 294          | 303          |
| 1                                 | 53<br>(13%)  | 51<br>(15%)  | 56<br>(17%)  | 52<br>(16%)  | 53<br>(15%)  | 39<br>(13%)  | 37<br>(13%)  | 36<br>(12%)  |
| 2                                 | 169<br>(42%) | 157<br>(45%) | 156<br>(46%) | 139<br>(42%) | 140<br>(39%) | 121<br>(40%) | 134<br>(46%) | 118<br>(39%) |
| 3                                 | 146<br>(36%) | 105<br>(30%) | 94<br>(28%)  | 104<br>(32%) | 124<br>(35%) | 103<br>(34%) | 95<br>(32%)  | 109<br>(36%) |

| HRQoL                            | REACT                    |                          |                          |                          | Control                  |                          |                          |                          |
|----------------------------------|--------------------------|--------------------------|--------------------------|--------------------------|--------------------------|--------------------------|--------------------------|--------------------------|
|                                  | Baseline                 | 6 months                 | 12 months                | 24 months                | Baseline                 | 6 months                 | 12 months                | 24 months                |
| 4                                | 29<br>(7%)               | 31<br>(9%)               | 30<br>(9%)               | 31<br>(9%)               | 36<br>(10%)              | 32<br>(11%)              | 22<br>(7%)               | 32<br>(11%)              |
| 5                                | 3<br>(1%)                | 2<br>(1%)                | 3<br>(1%)                | 4<br>(1%)                | 5<br>(1%)                | 5<br>(2%)                | 6<br>(2%)                | 8<br>(3%)                |
| Anxiety /<br>depression          | 397                      | 346                      | 338                      | 330                      | 357                      | 300                      | 293                      | 302                      |
| 1                                | 249<br>(63%)             | 219<br>(63%)             | 223<br>(66%)             | 209<br>(63%)             | 220<br>(62%)             | 190<br>(63%)             | 189<br>(65%)             | 196<br>(65%)             |
| 2                                | 106<br>(27%)             | 96<br>(28%)              | 86<br>(25%)              | 97<br>(29%)              | 97<br>(27%)              | 74<br>(25%)              | 69<br>(24%)              | 76<br>(25%)              |
| 3                                | 40<br>(10%)              | 25<br>(7%)               | 25<br>(7%)               | 21<br>(6%)               | 34<br>(10%)              | 27<br>(9%)               | 32<br>(11%)              | 29<br>(10%)              |
| 4                                | 2<br>(0%)                | 5<br>(1%)                | 3<br>(1%)                | 2<br>(1%)                | 6<br>(2%)                | 8<br>(3%)                | 2<br>(1%)                | 1<br>(0%)                |
| 5                                | 0<br>(0%)                | 1<br>(0%)                | 1<br>(0%)                | 1<br>(0%)                | 0<br>(0%)                | 1<br>(0%)                | 1<br>(0%)                | 0<br>(0%)                |
| <i>EQ-5D value, Mean (n, SD)</i> |                          |                          |                          |                          |                          |                          |                          |                          |
| Crosswalk<br>to EQ-5D-<br>3L     | 0.689<br>(397,<br>0.158) | 0.708<br>(346,<br>0.167) | 0.705<br>(337,<br>0.170) | 0.686<br>(330,<br>0.200) | 0.677<br>(352,<br>0.165) | 0.670<br>(299,<br>0.181) | 0.680<br>(293,<br>0.183) | 0.661<br>(302,<br>0.661) |
| EQ-5D-<br>VAS                    | 70.6<br>(399,<br>17.3)   | 72.6<br>(349,<br>16.7)   | 71.4<br>(338,<br>17.8)   | 70.4<br>(329,<br>18.4)   | 72.1<br>(362, 16.9)      | 72.0<br>(298,<br>17.3)   | 70.6<br>(294,<br>17.0)   | 69.4<br>(301,<br>19.2)   |
| EQ-5D-5L<br>value set            | 0.789<br>(397,<br>0.149) | 0.805<br>(346,<br>0.160) | 0.801<br>(337,<br>0.158) | 0.782<br>(330,<br>0.180) | 0.781<br>(352,<br>0.152) | 0.770<br>(299,<br>0.177) | 0.785<br>(293,<br>0.162) | 0.767<br>(302,<br>0.174) |
| <i>SF-36, Mean (n, SD)</i>       |                          |                          |                          |                          |                          |                          |                          |                          |
| PCS                              | 29.7<br>(393,<br>11.0)   | 32.8<br>(342,<br>11.5)   | 31.9<br>(334,<br>11.5)   | 30.9<br>(326,<br>12.0)   | 30.0<br>(352, 10.6)      | 30.6<br>(293,<br>10.9)   | 29.8<br>(293,<br>10.9)   | 29.2<br>(295,<br>10.8)   |
| MCS                              | 54.6<br>(393, 8.3)       | 54.4<br>(342,<br>8.6)    | 54.0<br>(334,<br>8.8)    | 54.3<br>(326, 8.6)       | 53.8<br>(352, 8.7)       | 54.0<br>(293,<br>9.1)    | 54.3<br>(293,<br>9.4)    | 54.5<br>(295, 9.1)       |
| SF-6D                            | 0.622<br>(365,<br>0.095) | 0.637<br>(323,<br>0.103) | 0.637<br>(313,<br>0.098) | 0.630<br>(312,<br>0.105) | 0.623<br>(326,<br>0.089) | 0.621<br>(280,<br>0.103) | 0.622<br>(280,<br>0.100) | 0.619<br>(283,<br>0.096) |

**Supplementary table 2: Health-related quality of life measured in the REACT study**

| HRQoL                             | REACT        |              |              |              | Control      |              |              |              |
|-----------------------------------|--------------|--------------|--------------|--------------|--------------|--------------|--------------|--------------|
|                                   | Baseline     | 6 months     | 12 months    | 24 months    | Baseline     | 6 months     | 12 months    | 24 months    |
| <i>EQ-5D-5L dimensions, n (%)</i> |              |              |              |              |              |              |              |              |
| Mobility                          | 400          | 346          | 339          | 330          | 358          | 299          | 294          | 303          |
| 1                                 | 91<br>(23%)  | 122<br>(35%) | 108<br>(32%) | 102<br>(31%) | 78<br>(22%)  | 70<br>(23%)  | 71<br>(24%)  | 66<br>(22%)  |
| 2                                 | 154<br>(38%) | 104<br>(30%) | 109<br>(32%) | 89<br>(27%)  | 120<br>(34%) | 98<br>(33%)  | 98<br>(33%)  | 90<br>(30%)  |
| 3                                 | 124<br>(31%) | 95<br>(17%)  | 95<br>(28%)  | 103<br>(31%) | 135<br>(38%) | 100<br>(33%) | 100<br>(34%) | 109<br>(36%) |
| 4                                 | 30<br>(8%)   | 25<br>(7%)   | 27<br>(8%)   | 33<br>(10%)  | 24<br>(7%)   | 30<br>(10%)  | 23<br>(8%)   | 35<br>(12%)  |
| 5                                 | 1<br>(0%)    | 0<br>(0%)    | 0<br>(0%)    | 3<br>(1%)    | 1<br>(0%)    | 1<br>(0%)    | 2<br>(1%)    | 3<br>(1%)    |
| Self-care                         | 400          | 346          | 338          | 330          | 359          | 299          | 294          | 303          |
| 1                                 | 321<br>(80%) | 287<br>(83%) | 273<br>(81%) | 254<br>(77%) | 278<br>(77%) | 227<br>(76%) | 235<br>(80%) | 237<br>(78%) |
| 2                                 | 53<br>(13%)  | 43<br>(12%)  | 53<br>(16%)  | 59<br>(18%)  | 58<br>(16%)  | 57<br>(19%)  | 44<br>(15%)  | 46<br>(15%)  |
| 3                                 | 24<br>(6%)   | 15<br>(4%)   | 11<br>(3%)   | 14<br>(4%)   | 20<br>(6%)   | 13<br>(4%)   | 15<br>(5%)   | 15<br>(5%)   |
| 4                                 | 1<br>(0%)    | 1<br>(0%)    | 1<br>(0%)    | 1<br>(0%)    | 3<br>(1%)    | 2<br>(1%)    | 0<br>(0%)    | 2<br>(1%)    |
| 5                                 | 1<br>(0%)    | 0<br>(0%)    | 0<br>(0%)    | 2<br>(1%)    | 0<br>(0%)    | 0<br>(0%)    | 0<br>(0%)    | 3<br>(1%)    |
| Usual activities                  | 399          | 346          | 339          | 330          | 356          | 299          | 294          | 303          |
| 1                                 | 148<br>(37%) | 171<br>(49%) | 150<br>(44%) | 134<br>(41%) | 146<br>(41%) | 114<br>(38%) | 118<br>(40%) | 113<br>(37%) |
| 2                                 | 153<br>(38%) | 105<br>(30%) | 119<br>(34%) | 112<br>(34%) | 127<br>(36%) | 115<br>(38%) | 96<br>(33%)  | 114<br>(38%) |
| 3                                 | 77<br>(19%)  | 61<br>(18%)  | 120<br>(19%) | 64<br>(19%)  | 69<br>(19%)  | 57<br>(19%)  | 64<br>(22%)  | 59<br>(19%)  |
| 4                                 | 16<br>(4%)   | 8<br>(2%)    | 11<br>(3%)   | 14<br>(4%)   | 12<br>(3%)   | 10<br>(3%)   | 12<br>(4%)   | 8<br>(3%)    |
| 5                                 | 5<br>(1%)    | 1<br>(0%)    | 3<br>(1%)    | 6<br>(2%)    | 2<br>(1%)    | 3<br>(1%)    | 4<br>(1%)    | 9<br>(3%)    |
| Pain / discomfort                 | 400          | 346          | 339          | 330          | 358          | 300          | 294          | 303          |
| 1                                 | 53<br>(13%)  | 51<br>(15%)  | 56<br>(17%)  | 52<br>(16%)  | 53<br>(15%)  | 39<br>(13%)  | 37<br>(13%)  | 36<br>(12%)  |
| 2                                 | 169<br>(42%) | 157<br>(45%) | 156<br>(46%) | 139<br>(42%) | 140<br>(39%) | 121<br>(40%) | 134<br>(46%) | 118<br>(39%) |
| 3                                 | 146<br>(36%) | 105<br>(30%) | 94<br>(28%)  | 104<br>(32%) | 124<br>(35%) | 103<br>(34%) | 95<br>(32%)  | 109<br>(36%) |



| HRQoL                            | REACT                    |                          |                          |                          | Control                  |                          |                          |                          |
|----------------------------------|--------------------------|--------------------------|--------------------------|--------------------------|--------------------------|--------------------------|--------------------------|--------------------------|
|                                  | Baseline                 | 6 months                 | 12 months                | 24 months                | Baseline                 | 6 months                 | 12 months                | 24 months                |
| 4                                | 29<br>(7%)               | 31<br>(9%)               | 30<br>(9%)               | 31<br>(9%)               | 36<br>(10%)              | 32<br>(11%)              | 22<br>(7%)               | 32<br>(11%)              |
| 5                                | 3<br>(1%)                | 2<br>(1%)                | 3<br>(1%)                | 4<br>(1%)                | 5<br>(1%)                | 5<br>(2%)                | 6<br>(2%)                | 8<br>(3%)                |
| Anxiety /<br>depression          | 397                      | 346                      | 338                      | 330                      | 357                      | 300                      | 293                      | 302                      |
| 1                                | 249<br>(63%)             | 219<br>(63%)             | 223<br>(66%)             | 209<br>(63%)             | 220<br>(62%)             | 190<br>(63%)             | 189<br>(65%)             | 196<br>(65%)             |
| 2                                | 106<br>(27%)             | 96<br>(28%)              | 86<br>(25%)              | 97<br>(29%)              | 97<br>(27%)              | 74<br>(25%)              | 69<br>(24%)              | 76<br>(25%)              |
| 3                                | 40<br>(10%)              | 25<br>(7%)               | 25<br>(7%)               | 21<br>(6%)               | 34<br>(10%)              | 27<br>(9%)               | 32<br>(11%)              | 29<br>(10%)              |
| 4                                | 2<br>(0%)                | 5<br>(1%)                | 3<br>(1%)                | 2<br>(1%)                | 6<br>(2%)                | 8<br>(3%)                | 2<br>(1%)                | 1<br>(0%)                |
| 5                                | 0<br>(0%)                | 1<br>(0%)                | 1<br>(0%)                | 1<br>(0%)                | 0<br>(0%)                | 1<br>(0%)                | 1<br>(0%)                | 0<br>(0%)                |
| <i>EQ-5D value, Mean (n, SD)</i> |                          |                          |                          |                          |                          |                          |                          |                          |
| Crosswalk<br>to EQ-5D-<br>3L     | 0.689<br>(397,<br>0.158) | 0.708<br>(346,<br>0.167) | 0.705<br>(337,<br>0.170) | 0.686<br>(330,<br>0.200) | 0.677<br>(352,<br>0.165) | 0.670<br>(299,<br>0.181) | 0.680<br>(293,<br>0.183) | 0.661<br>(302,<br>0.661) |
| EQ-5D-<br>VAS                    | 70.6<br>(399,<br>17.3)   | 72.6<br>(349,<br>16.7)   | 71.4<br>(338,<br>17.8)   | 70.4<br>(329,<br>18.4)   | 72.1<br>(362, 16.9)      | 72.0<br>(298,<br>17.3)   | 70.6<br>(294,<br>17.0)   | 69.4<br>(301,<br>19.2)   |
| EQ-5D-5L<br>value set            | 0.789<br>(397,<br>0.149) | 0.805<br>(346,<br>0.160) | 0.801<br>(337,<br>0.158) | 0.782<br>(330,<br>0.180) | 0.781<br>(352,<br>0.152) | 0.770<br>(299,<br>0.177) | 0.785<br>(293,<br>0.162) | 0.767<br>(302,<br>0.174) |
| <i>SF-36, Mean (n, SD)</i>       |                          |                          |                          |                          |                          |                          |                          |                          |
| PCS                              | 29.7<br>(393,<br>11.0)   | 32.8<br>(342,<br>11.5)   | 31.9<br>(334,<br>11.5)   | 30.9<br>(326,<br>12.0)   | 30.0<br>(352, 10.6)      | 30.6<br>(293,<br>10.9)   | 29.8<br>(293,<br>10.9)   | 29.2<br>(295,<br>10.8)   |
| MCS                              | 54.6<br>(393, 8.3)       | 54.4<br>(342,<br>8.6)    | 54.0<br>(334,<br>8.8)    | 54.3<br>(326, 8.6)       | 53.8<br>(352, 8.7)       | 54.0<br>(293,<br>9.1)    | 54.3<br>(293,<br>9.4)    | 54.5<br>(295, 9.1)       |
| SF-6D                            | 0.622<br>(365,<br>0.095) | 0.637<br>(323,<br>0.103) | 0.637<br>(313,<br>0.098) | 0.630<br>(312,<br>0.105) | 0.623<br>(326,<br>0.089) | 0.621<br>(280,<br>0.103) | 0.622<br>(280,<br>0.100) | 0.619<br>(283,<br>0.096) |

**Supplementary table 2: Health-related quality of life measured in the REACT study**

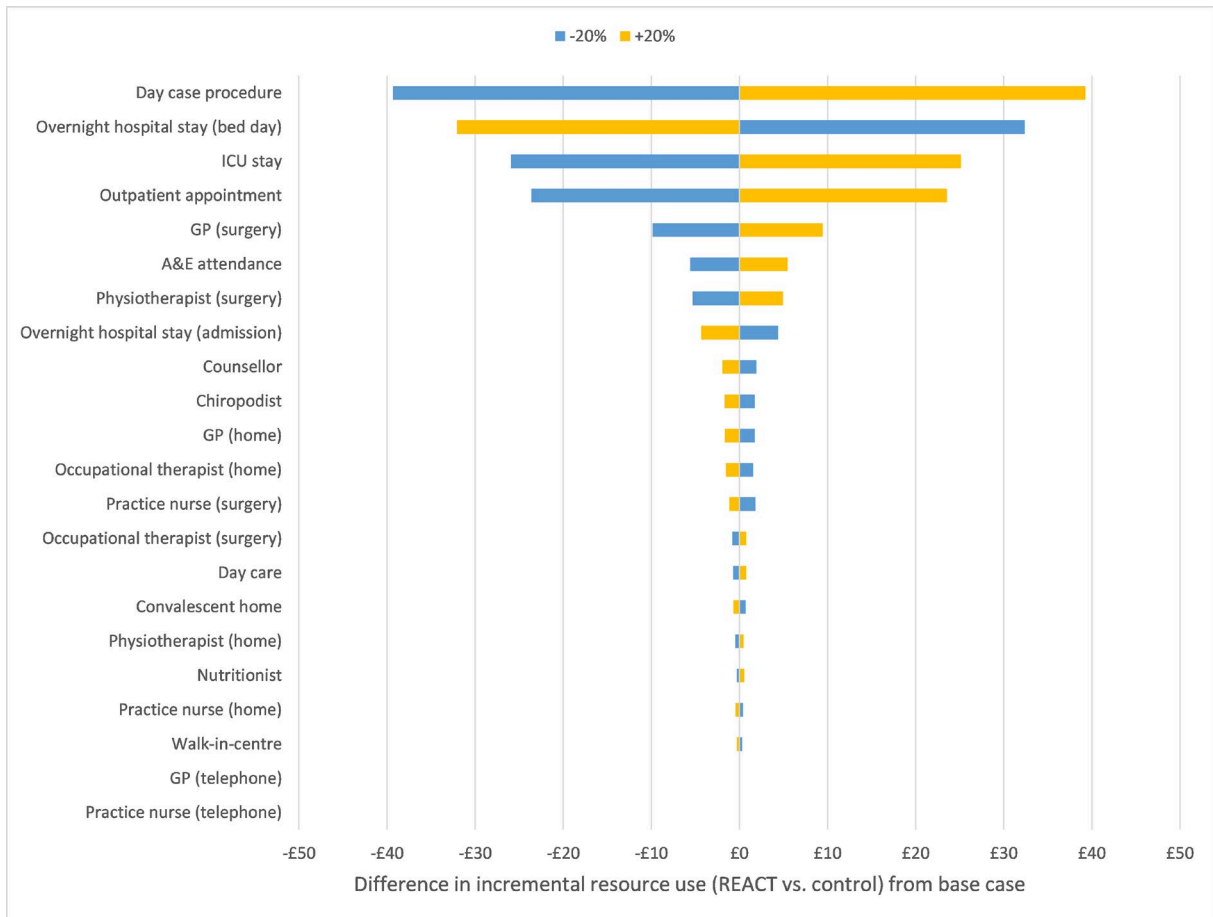

**Supplementary figure 4: Comparison of resource use between REACT and control participants**

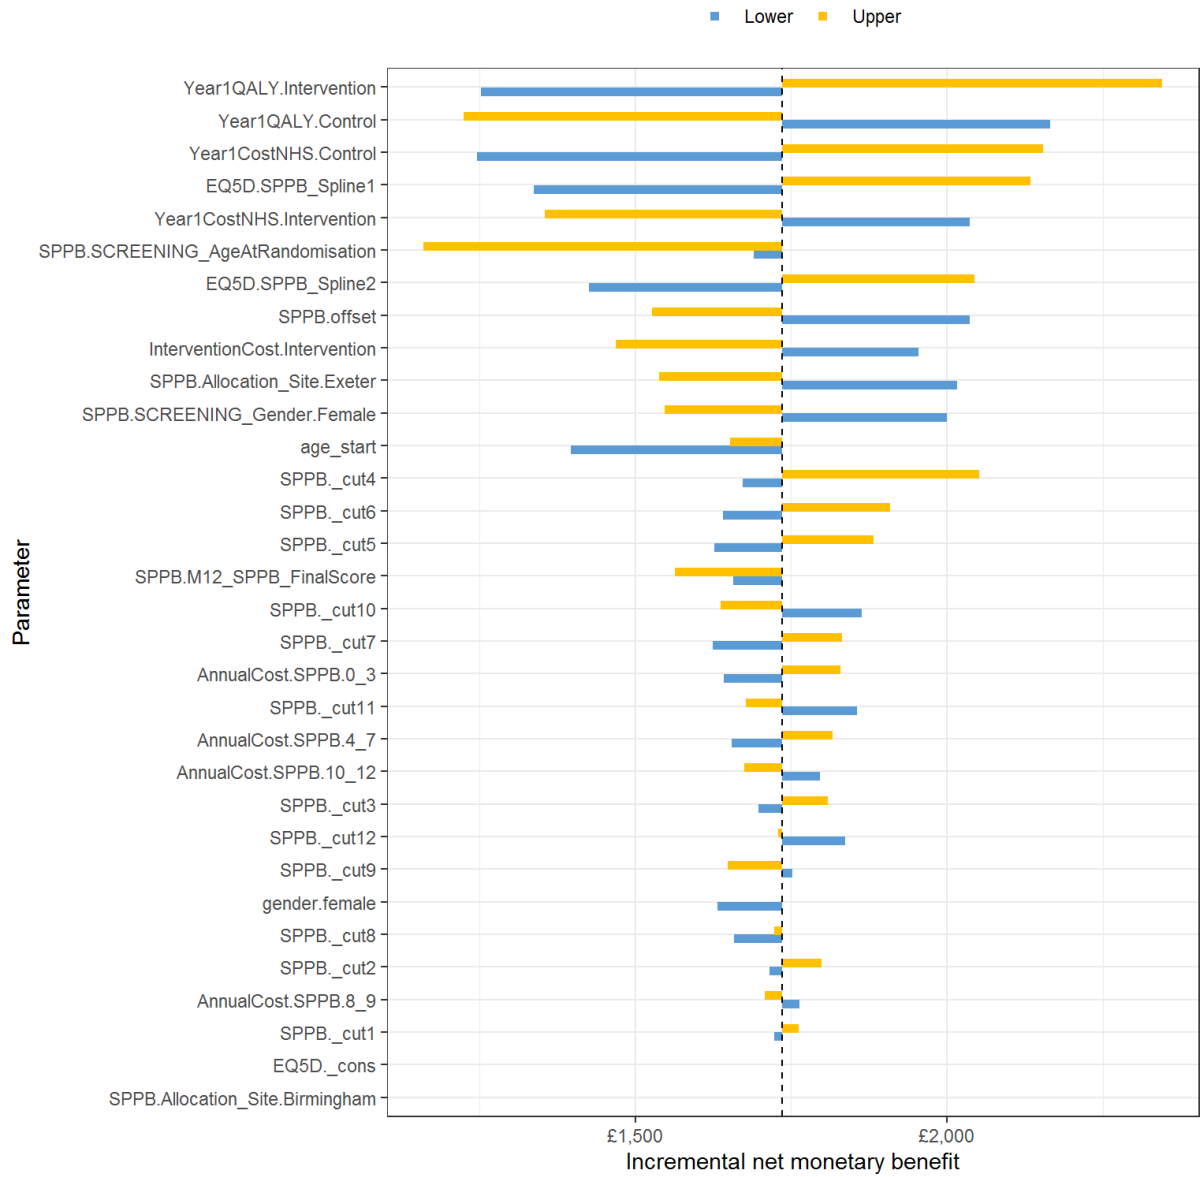

**Supplementary figure 5: Sensitivity analyses for model parameters**
